# Supplementary material
Source: MDPI journal article supplement (https://www.mdpi.com/2075-5309/13/2/374)
Supplement: s1 [file s1]

**Table S1.** Ultimate load, fracture energy and crack pattern for simple beams with ratio 0.15% reinforcement ratio.

| Beam no. | Ultimate load (kN) | $W_o$ (N.m) | $G_f$ (N/m) | Crack Pattern                                                                                          |
|----------|--------------------|-------------|-------------|--------------------------------------------------------------------------------------------------------|
| Steel6-6 | 38                 | 1524.25     | 40646.7     | 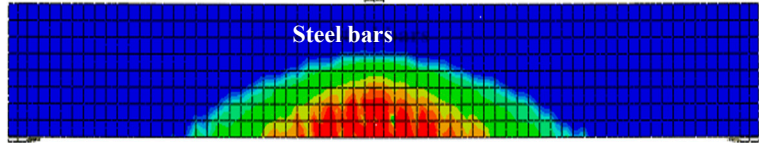 <p>Steel bars</p>  |
| GFRP6-6  | 39                 | 1513.25     | 40353.3     |  <p>GFRP bars</p>   |
| AFRP6-6  | 50                 | 2087.5      | 55666.7     |  <p>AFRP bars</p>   |
| CFRP6-6  | 70                 | 2650.75     | 70686.7     |  <p>CFRP bars</p>  |
| BFRP6-6  | 32                 | 1372.75     | 36606.7     |  <p>BFRP bars</p> |

**Table S2.** Ultimate load, fracture energy and crack pattern for simple beams with 0.27% reinforcement ratio.

| Beam no.  | Ultimate load (KN) | $W_o$ (N.m) | $Gf$ (N/m) | Crack Pattern                                                                        |
|-----------|--------------------|-------------|------------|--------------------------------------------------------------------------------------|
| Steel 8-8 | 65                 | 3043        | 81150      | 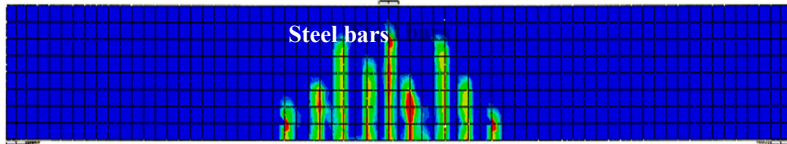   |
| GFRP8-8   | 43                 | 1714.75     | 45799.3    |    |
| AFRP8-8   | 60                 | 2473        | 65946.7    |    |
| CFRP8-8   | 90                 | 3267.75     | 87140      |   |
| BFRP8-8   | 37                 | 1736        | 46293.3    |  |

**Table S3.** Ultimate load, fracture energy and crack pattern for simple beams with 0.42% reinforcement ratio.

| Beam no.   | Ultimate load<br>(kN) | $W_o$<br>(N.m) | $G_f$ (N/m) | Crack Pattern                                                                                         |
|------------|-----------------------|----------------|-------------|-------------------------------------------------------------------------------------------------------|
| Steel10-10 | 85                    | 4168           | 111115      | 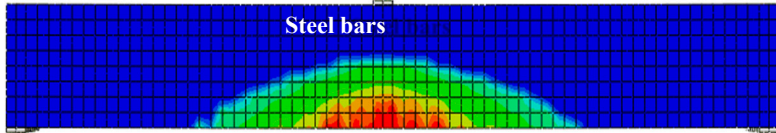 <p>Steel bars</p>  |
| GFRP10-10  | 50                    | 2049           | 54658       |  <p>GFRP bars</p>   |
| AFRP10-10  | 80                    | 3000           | 80000       |  <p>AFRP bars</p>   |
| CFRP10-10  | 110                   | 3500           | 9333.3      |  <p>CFRP bars</p>  |
| BFRP10-10  | 43                    | 1853.25        | 49420       |  <p>BFRP bars</p> |

**Table S4.** Ultimate load, fracture energy and crack pattern for simple beams with 0.60% reinforcement ratio.

| Beam no.   | Ultimate load (kN) | $W_o$ (N.m) | $G_f$ (N/m) | Crack Pattern                                                                                         |
|------------|--------------------|-------------|-------------|-------------------------------------------------------------------------------------------------------|
| Steel12-12 | 120                | 5147.25     | 137260      | 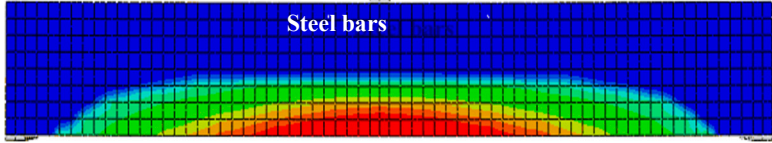 <p>Steel bars</p>  |
| GFRP12-12  | 55                 | 2184.25     | 58246.7     |  <p>GFRP bars</p>   |
| AFRP12-12  | 85                 | 3920        | 104533      |  <p>AFRP bars</p>   |
| CFRP12-12  | 100                | 3776.75     | 100713.3    |  <p>CFRP bars</p>  |
| BFRP12-12  | 50                 | 2107.5      | 56200       |  <p>BFRP bars</p> |

**Table S5.** Ultimate load, fracture energy and crack pattern for overhanging beam with 0.15% reinforcement ratio.

| Beam no. | Ultimate load(kN) | $W_o$ (N.m) | $G_f$ (N/m) | Crack Pattern                                                                                         |
|----------|-------------------|-------------|-------------|-------------------------------------------------------------------------------------------------------|
| Steel6-6 | 15                | 550         | 14666       | 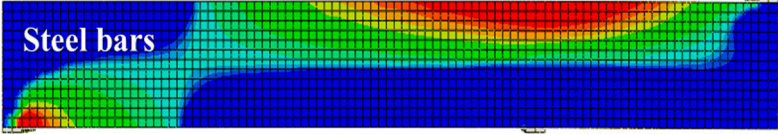 <p>Steel bars</p>  |
| GFRP6-6  | 20                | 586.5       | 15640       |  <p>GFRP bars</p>   |
| AFRP6-6  | 29                | 1186        | 31626.7     |  <p>AFRP bars</p>   |
| CFRP6-6  | 46                | 1467.5      | 39133.3     |  <p>CFRP bars</p>  |
| BFRP6-6  | 23                | 1234.3      | 32914.7     |  <p>BFRP bars</p> |



**Table S6.** Ultimate load, fracture energy and crack pattern for overhanging beam with 0.27% reinforcement ratio.

| Beam no. | Ultimate load (kN) | $W_o$ (N.m) | $G_f$ (N/m) | Crack Pattern                                                                                         |
|----------|--------------------|-------------|-------------|-------------------------------------------------------------------------------------------------------|
| Steel8-8 | 22                 | 586.5       | 15640       | 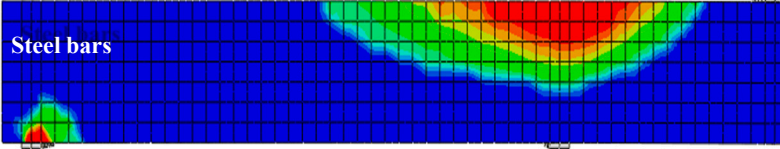 <p>Steel bars</p>  |
| GFRP8-8  | 30                 | 1234.25     | 32913.3     |  <p>GFRP bars</p>   |
| AFRP8-8  | 36                 | 1467.5      | 39133.3     |  <p>AFRP bars</p>   |
| CFRP8-8  | 56                 | 2105.75     | 56153.3     |  <p>CFRP bars</p> |
| BFRP8-8  | 30                 | 1261.25     | 33633.3     |  <p>BFRP bars</p> |

**Table S7.** Ultimate load, fracture energy and crack pattern for overhanging beam with 0.42% reinforcement ratio.

| Beam no.   | Ultimate load (kN) | $W_o$ (N.m) | $Gf$ (N/m) | Crack Pattern                                                                                         |
|------------|--------------------|-------------|------------|-------------------------------------------------------------------------------------------------------|
| Steel10-10 | 45                 | 1759        | 46906.7    | 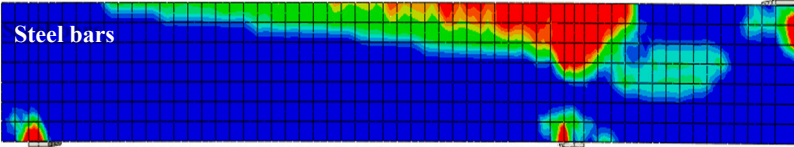 <p>Steel bars</p>  |
| GFRP10-10  | 38                 | 1600        | 42666      |  <p>GFRP bars</p>   |
| AFRP10-10  | 40                 | 1688        | 45013.3    |  <p>AFRP bars</p>  |
| CFRP10-10  | 60                 | 2708        | 72213.3    |  <p>CFRP bars</p> |
| BFRP10-10  | 35                 | 1888.2      | 50353      |  <p>BFRP bars</p> |

**Table S8.** Ultimate load, fracture energy and crack pattern for overhanging beam with 0.60% reinforcement ratio.

| Beam no.   | Ultimate load (kN) | $W_o$ (N.m) | $G_f$ (N/m) | Crack Pattern                                                                                         |
|------------|--------------------|-------------|-------------|-------------------------------------------------------------------------------------------------------|
| Steel12-12 | 80                 | 3347        | 89253.3     | 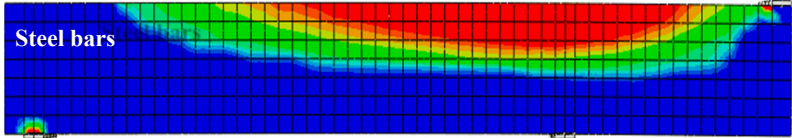 <p>Steel bars</p>  |
| GFRP12-12  | 45                 | 1883        | 50550       |  <p>GFRP bars</p>   |
| AFRP12-12  | 58                 | 1900        | 60933.3     |  <p>AFRP bars</p>   |
| CFRP12-12  | 75                 | 2915.25     | 77740       |  <p>CFRP bars</p>  |
| BFRP12-12  | 45                 | 1952.25     | 52060       |  <p>BFRP bars</p> |
